# Supplementary material for: Mosquito community composition shapes virus prevalence patterns along anthropogenic disturbance gradients
Source: eLife journal article supplement (doi:10.7554/elife.66550), 2023-09-13

**A**

*Cimo rhabdovirus I (A02)*  
*Rhabdovirus-like NIRVS I (A19)*  
*Rhabdovirus-like NIRVS II (B82)*

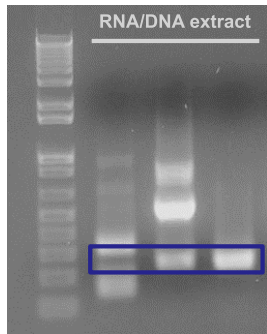**B**

Flavivirus-like NIRVS II (E01)

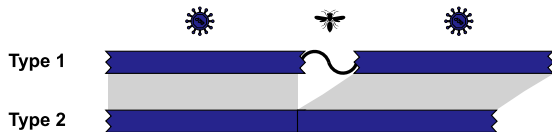

Flavivirus-like NIRVS III (C78)

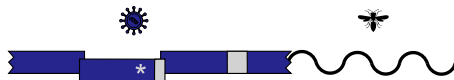

Flavivirus-like NIRVS IV (B18)

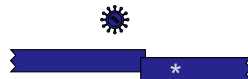

Flavivirus-like NIRVS X (E11)

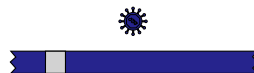

Supplement: supp [file elife-66550-supp-v1.zip]
