# Supplementary material for: Mosquito community composition shapes virus prevalence patterns along anthropogenic disturbance gradients
Source: eLife. 2023 Sep 13;12:e66550. doi: 10.7554/eLife.66550 (PMC10547478; doi:10.7554/eLife.66550)
Supplement: Supplementary file 1. — Significant predictors show the difference to the baseline combination. CulAnn: Culex annuloris; CulDec: Culex decens; CulNeb: Culex nebulosus; Cul_spec: other Culex species; Ura_spec: Uranotaenia species; Coq_spec: Coquillettidia species; Ano_spec: Anopheles species; others: all other grouped species. PF: primary forest; SF: secondary forest; A: agriculture; C: camp; V: village. [file elife-66550-supp1.xlsx]

## Sheet: Tabelle1
	Mosquito counts
Predictors	Log-Mean	CI	Statistic	p
Intercept (PF / Ano_spec)	2.69	2.09 – 3.05	12.08	<0.001
Habitat (SF)	3.75	2.76 – 5.57	5.78	<0.001
Habitat (A)	0.05	-1.51 – 0.93	0.08	0.933
Habitat (C)	1.23	0.48 – 2.24	2.96	0.003
Habitat (V)	0.4	-0.19 – 0.96	1.37	0.17
Mosquito Group (Coq_spec)	-0.79	-1.60 – -0.03	-2.13	0.033
Mosquito Group (Cul_spec)	0.87	0.47 – 1.48	3.65	<0.001
Mosquito Group (CulAnn)	-1.09	-2.00 – -0.27	-2.61	0.009
Mosquito Group (CulDec)	2.03	1.65 – 2.64	8.81	<0.001
Mosquito Group (CulNeb)	1.8	1.41 – 2.40	7.8	<0.001
Mosquito Group (others)	2.85	2.48 – 3.44	12.68	<0.001
Mosquito Group (UraSpec)	1.23	0.84 – 1.84	5.25	<0.001
SF : Coq_spec	-6.14	-8.53 – -4.49	-6.24	<0.001
A : Coq_spec	-1.93	-3.77 – -0.07	-2.29	0.022
C : Coq_spec	0.08	-1.52 – 2.10	0.1	0.921
V : Coq_spec	1.31	0.29 – 2.79	2.23	0.026
SF : Cul_spec	-2.65	-4.49 – -1.59	-3.95	<0.001
A : Cul_spec	0.37	-0.60 – 1.96	0.62	0.535
C : Cul_spec	-1.83	-2.88 – -1.01	-4.09	<0.001
V : Cul_spec	-1.18	-1.89 – -0.47	-3.28	0.001
SF : CulAnn	-2.17	-4.41 – 0.06	-2.12	0.034
A : CulAnn	-1.67	-3.55 – 0.25	-1.91	0.057
C : CulAnn	-0.45	-2.70 – 1.81	-0.43	0.668
V : CulAnn	3.86	2.59 – 5.66	5.17	<0.001
SF : CulDec	-3.28	-5.13 – -2.22	-4.88	<0.001
A : CulDec	-2	-2.94 – -0.42	-3.44	0.001
C : CulDec	0.85	-0.18 – 1.65	1.96	0.05
V : CulDec	0.02	-0.57 – 0.63	0.08	0.937
SF : CulNeb	-1.52	-3.36 – -0.48	-2.29	0.022
A : CulNeb	0.14	-0.79 – 1.71	0.24	0.812
C : CulNeb	-1.26	-2.29 – -0.47	-2.91	0.004
V : CulNeb	-0.78	-1.39 – -0.15	-2.48	0.013
SF : others	-4.49	-6.32 – -3.49	-6.9	<0.001
A : others	-0.26	-1.15 – 1.30	-0.46	0.646
C : others	-0.8	-1.82 – -0.03	-1.9	0.057
V : others	-0.41	-0.99 – 0.18	-1.39	0.163
SF : UraSpec	-5.57	-7.41 – -4.52	-8.33	<0.001
A : UraSpec	0.93	-0.02 – 2.51	1.58	0.114
C : UraSpec	-2.23	-3.28 – -1.41	-4.98	<0.001
V : UraSpec	-0.18	-0.83 – 0.49	-0.53	0.597
Observations	40
R2 Nagelkerke	1
