# Supplementary figures and images for: Mosquito community composition shapes virus prevalence patterns along anthropogenic disturbance gradients
Source: eLife journal article supplement (doi:10.7554/elife.66550), 2023-09-13

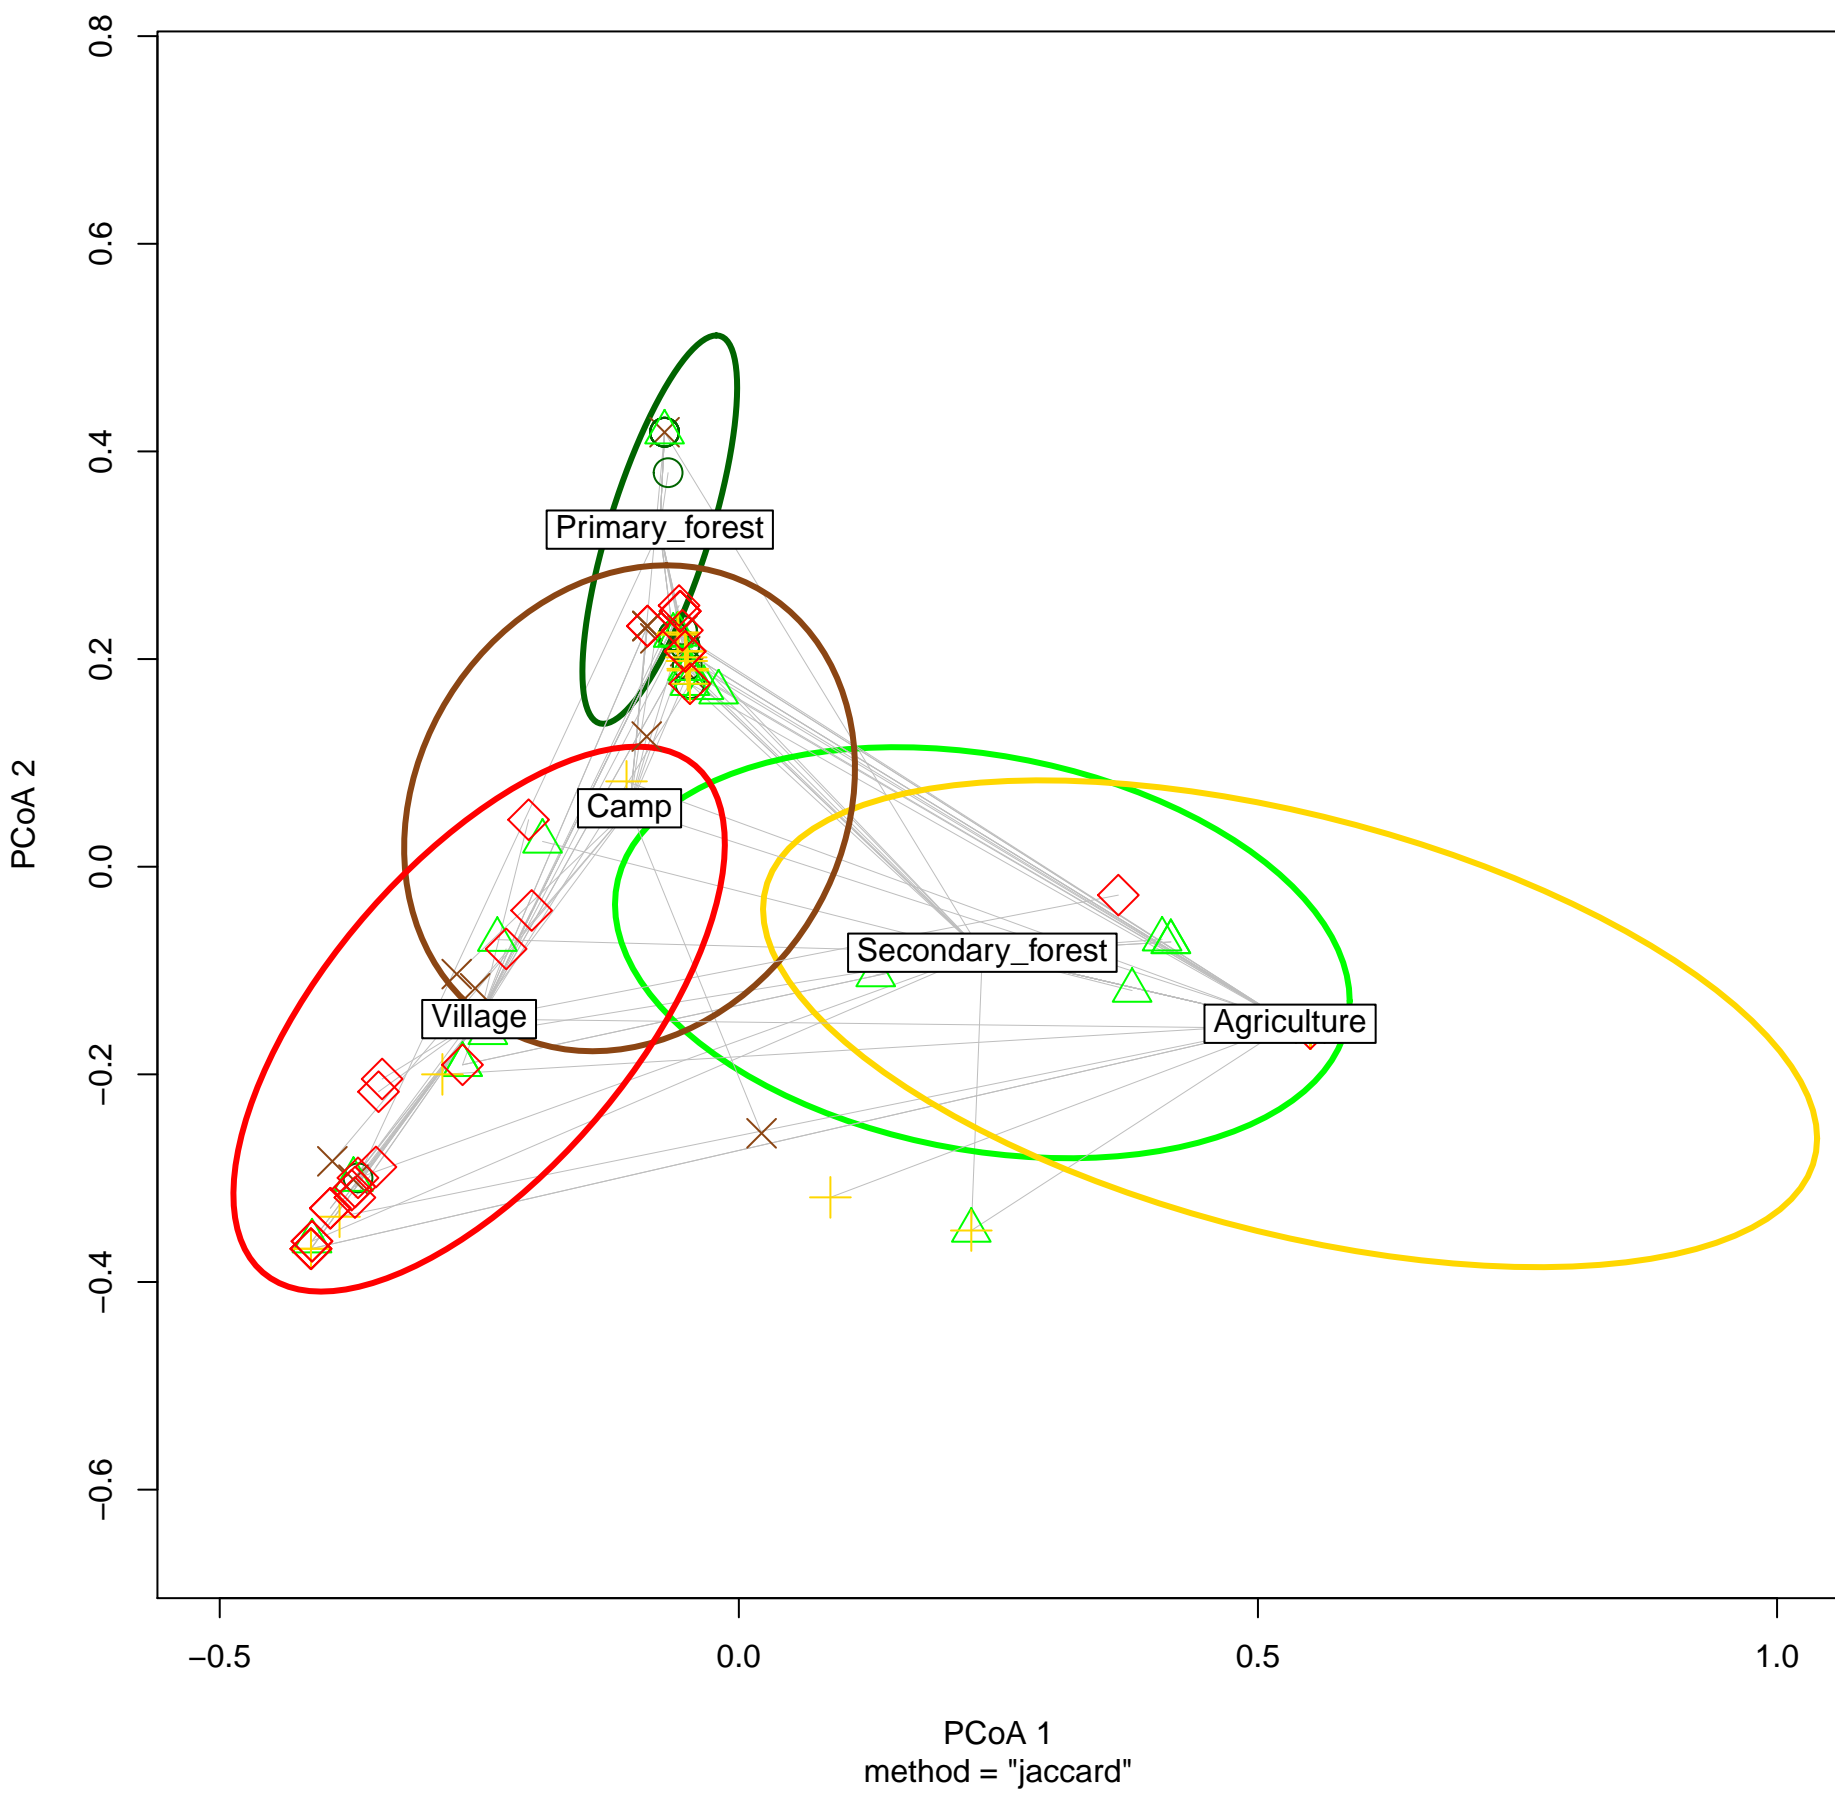

Supplement: supp [file elife-66550-supp-v1.zip]

A

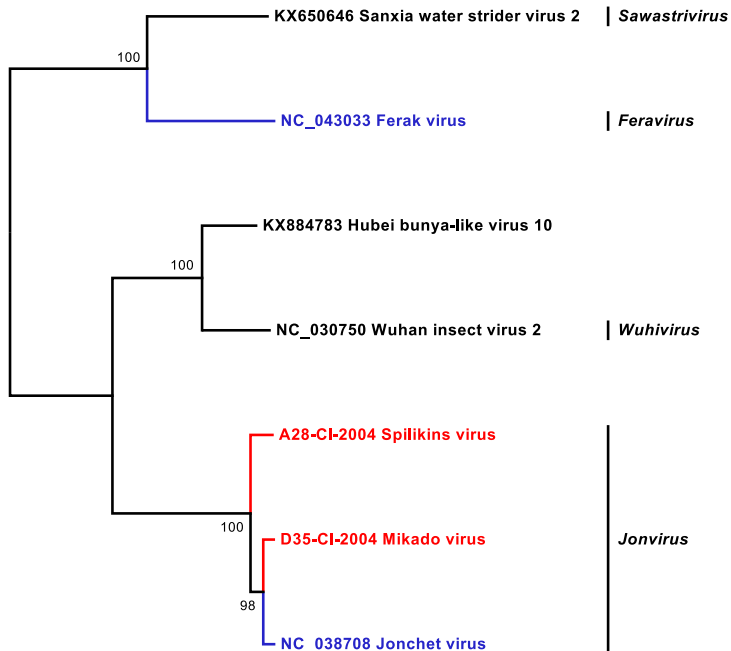

0.2

B

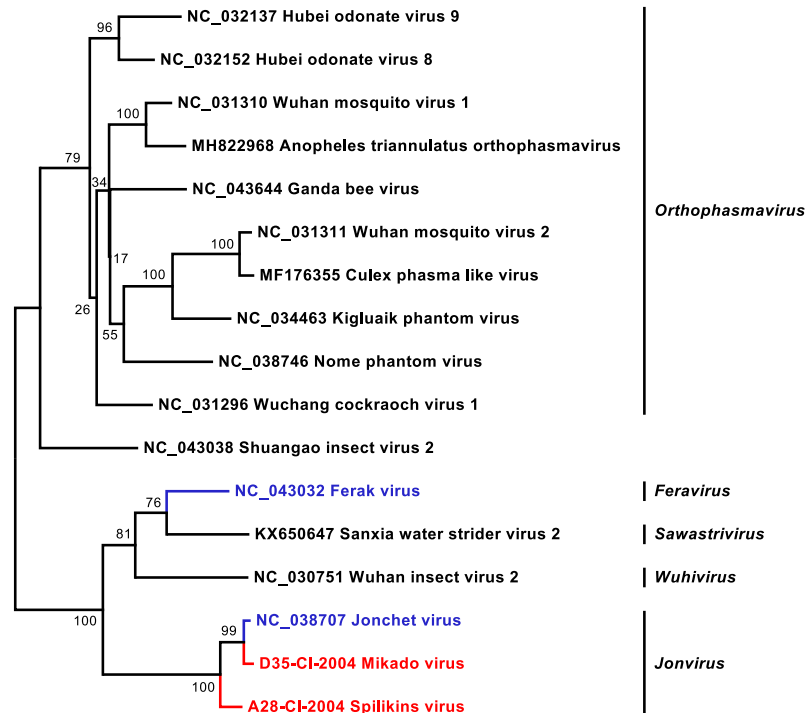

0.5

Supplement: supp [file elife-66550-supp-v1.zip]

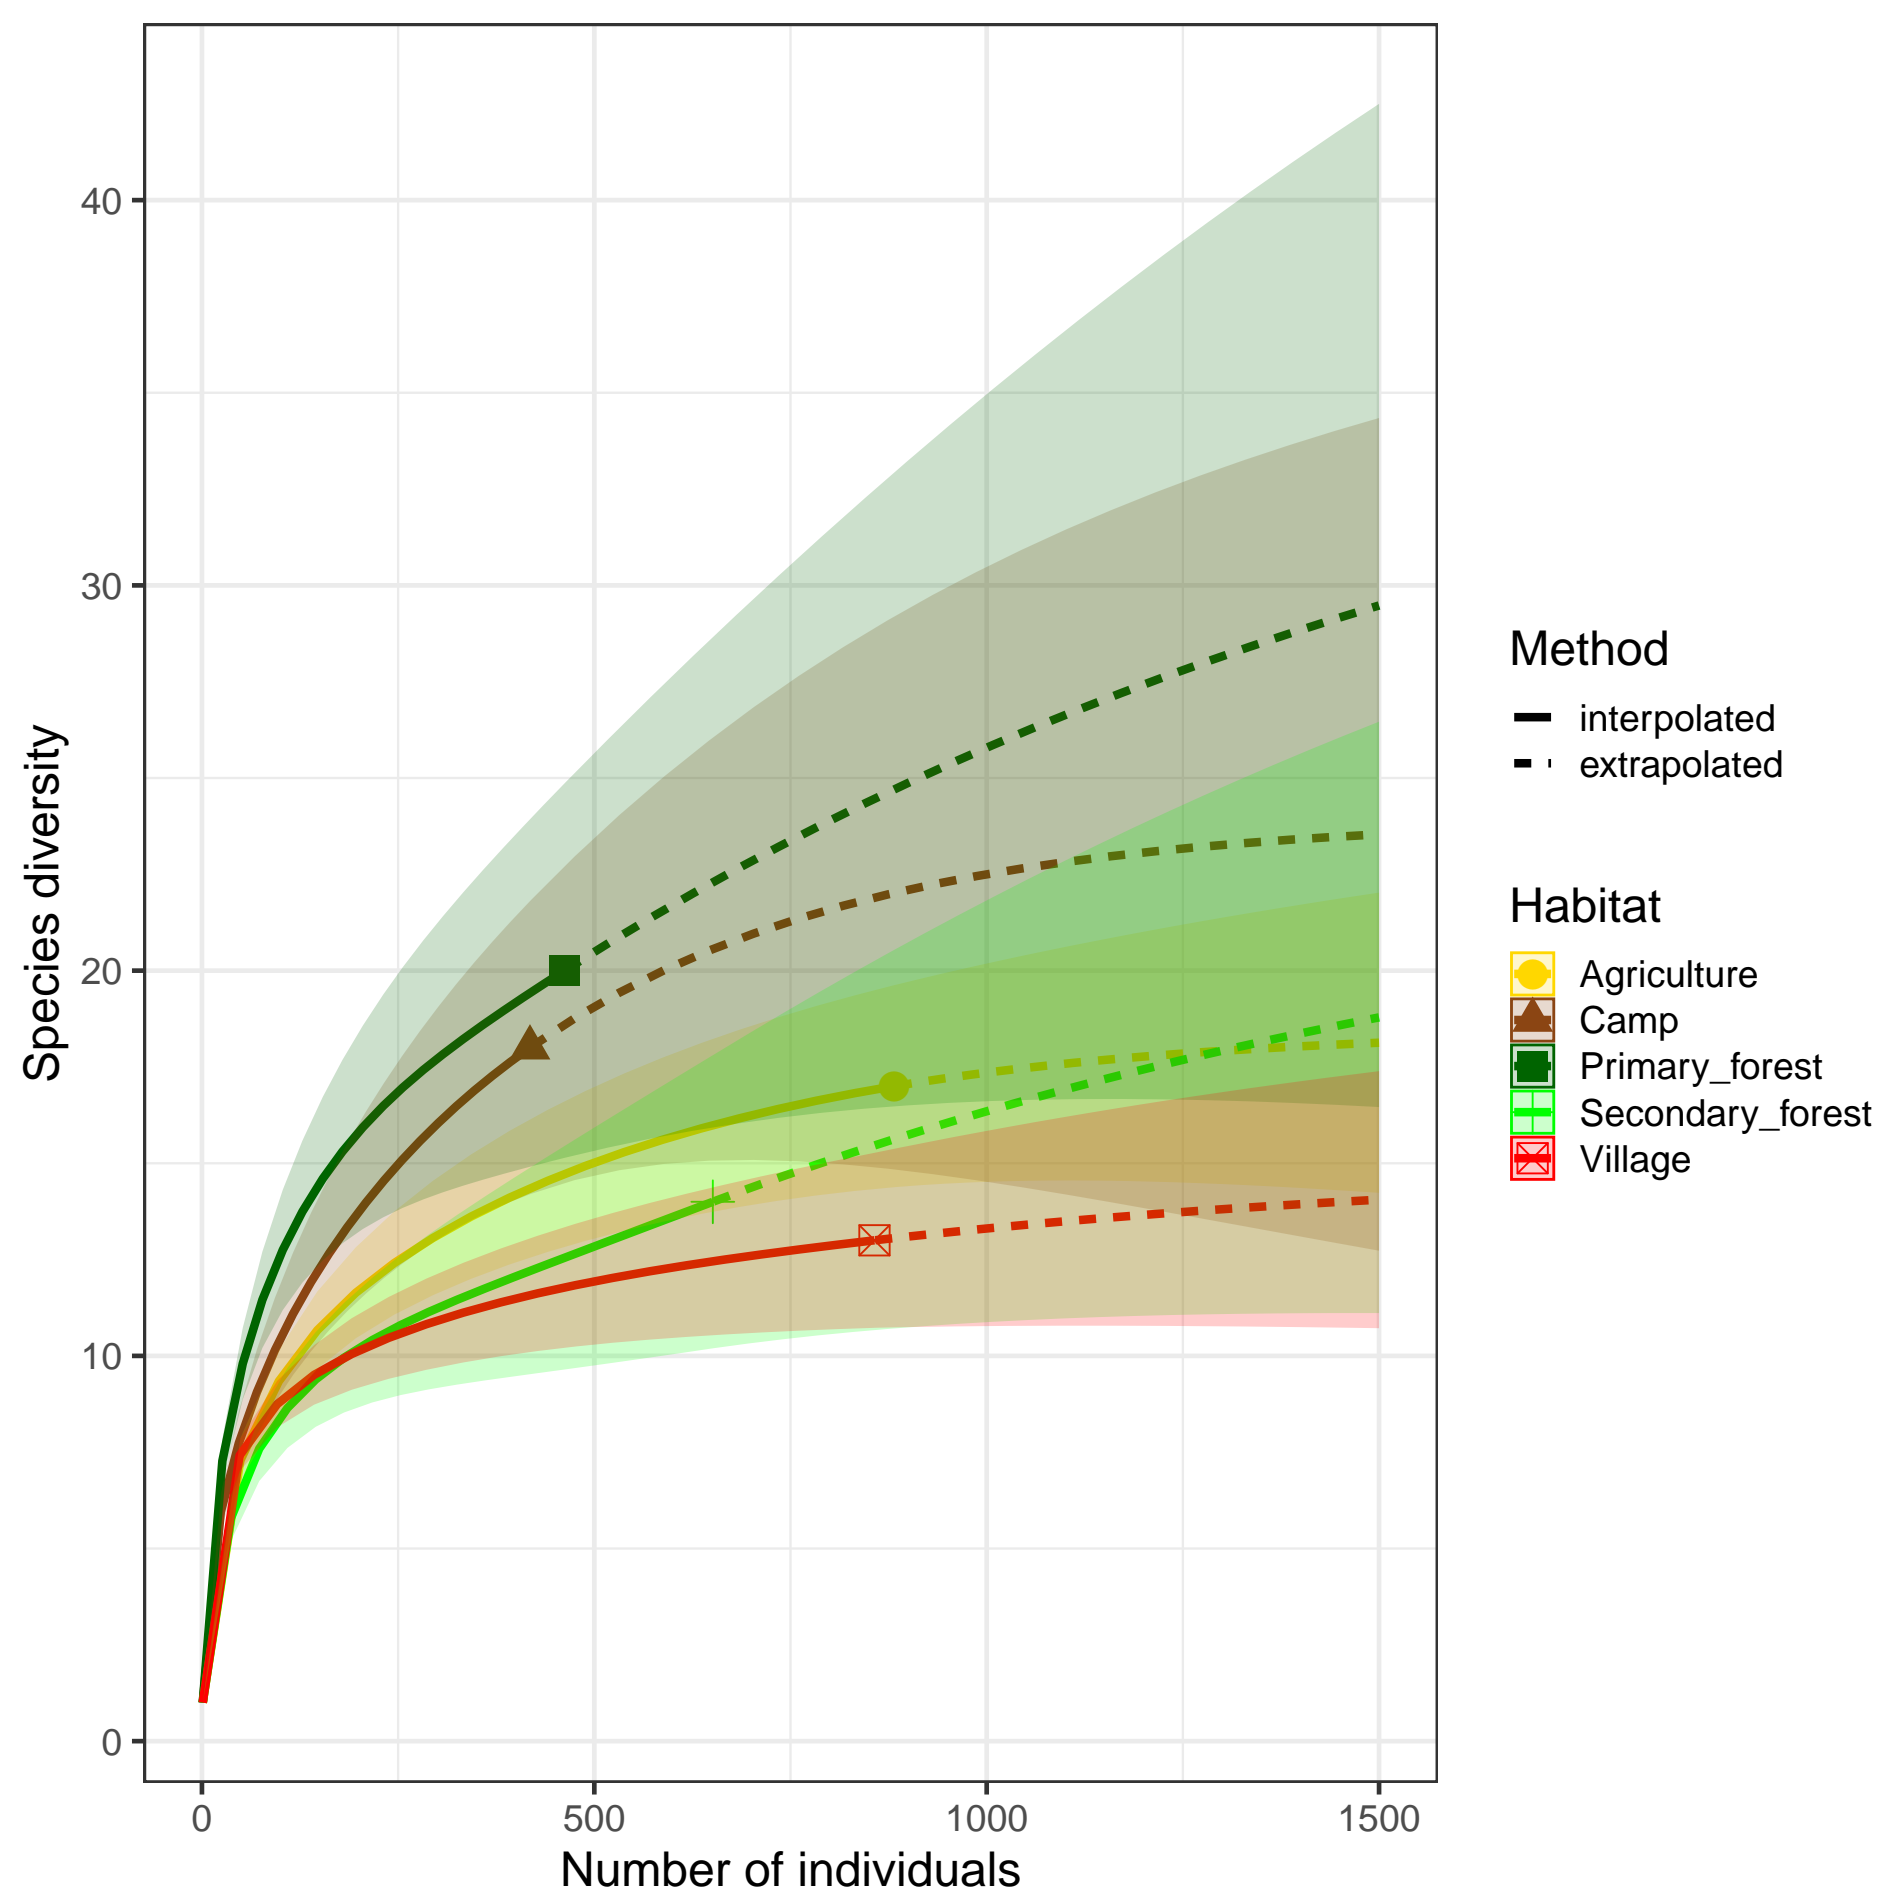

Supplement: supp [file elife-66550-supp-v1.zip]

A

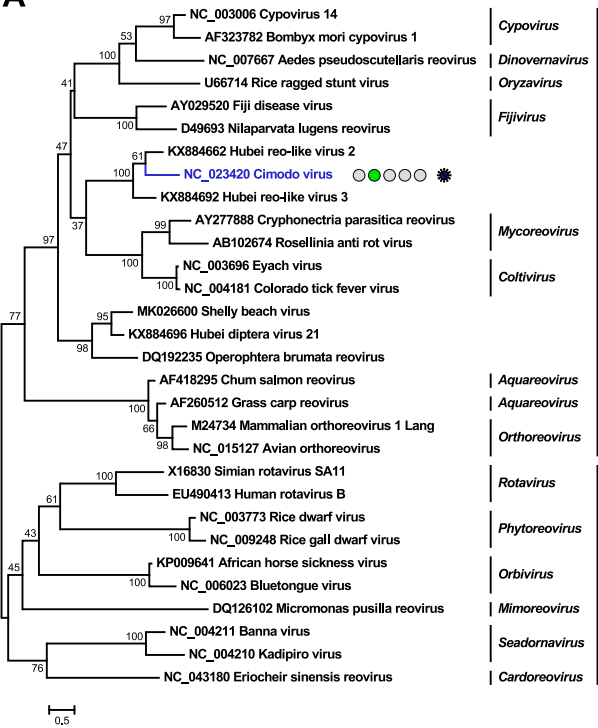

B

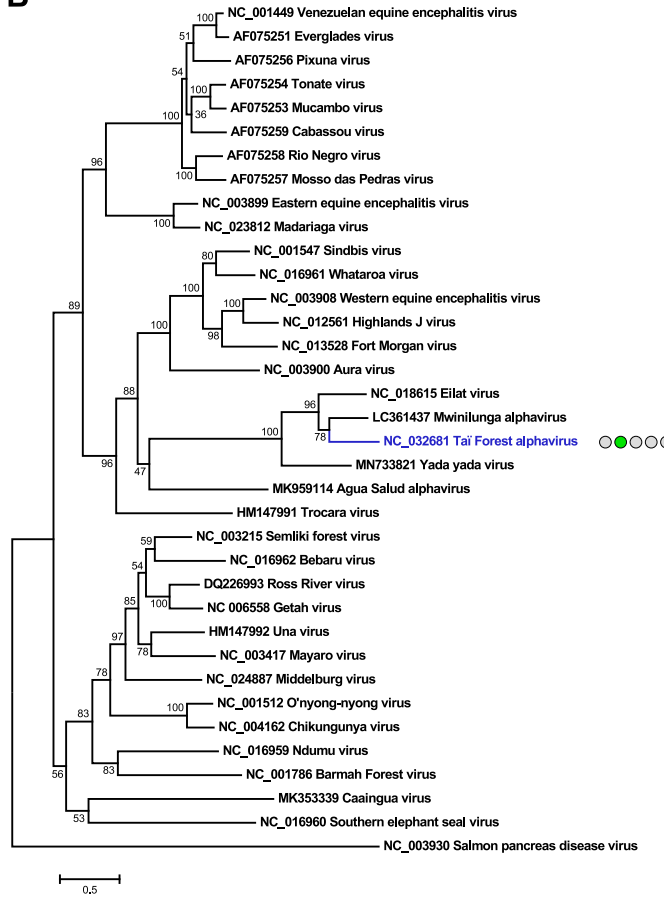

C

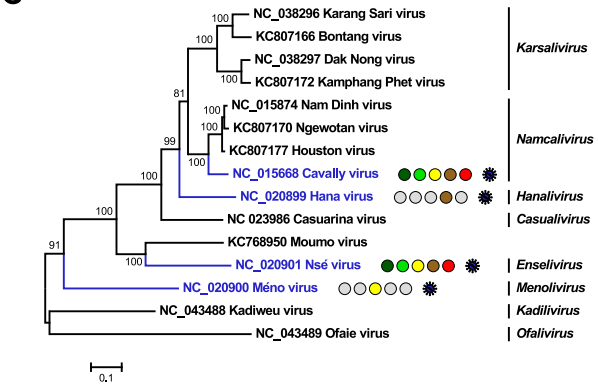

Supplement: supp [file elife-66550-supp-v1.zip]

**A**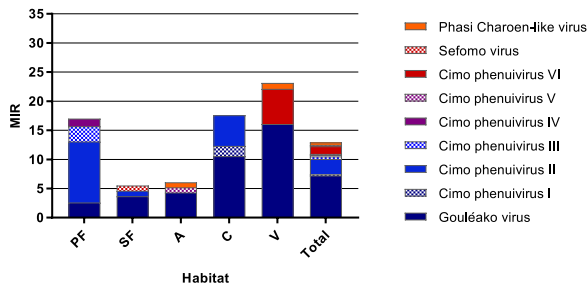**B**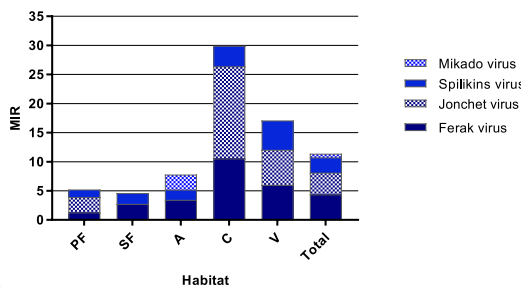**C**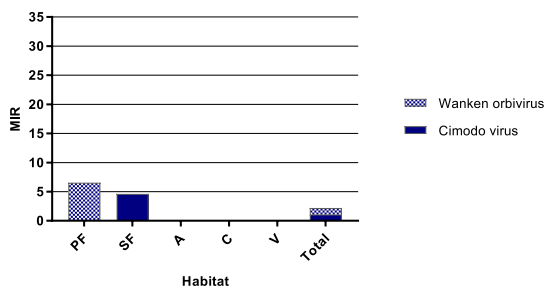**D**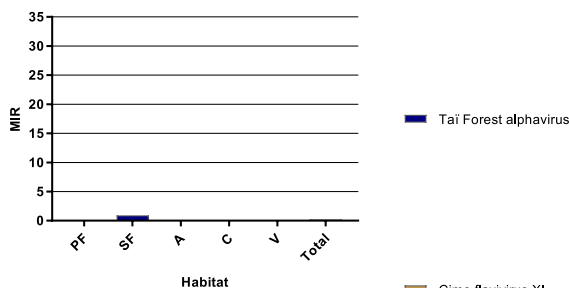**E**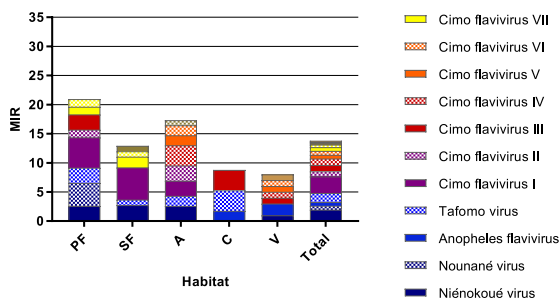**F**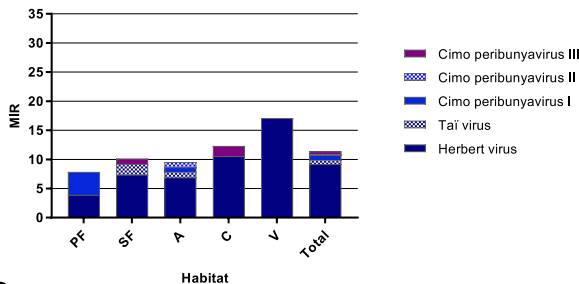**G**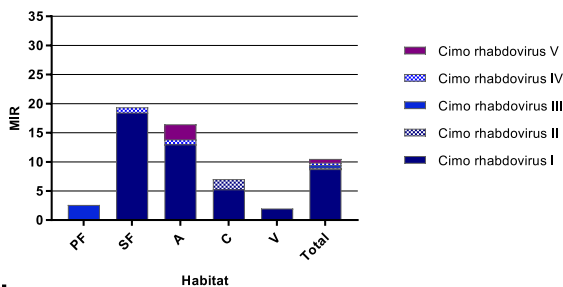**H**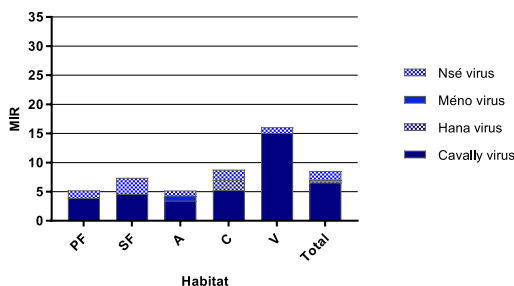**I**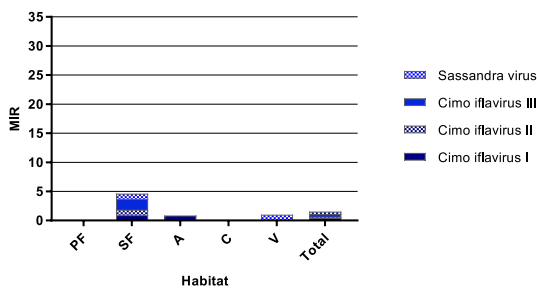**J**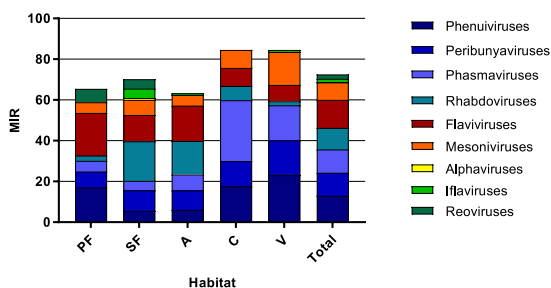

Supplement: supp [file elife-66550-supp-v1.zip]

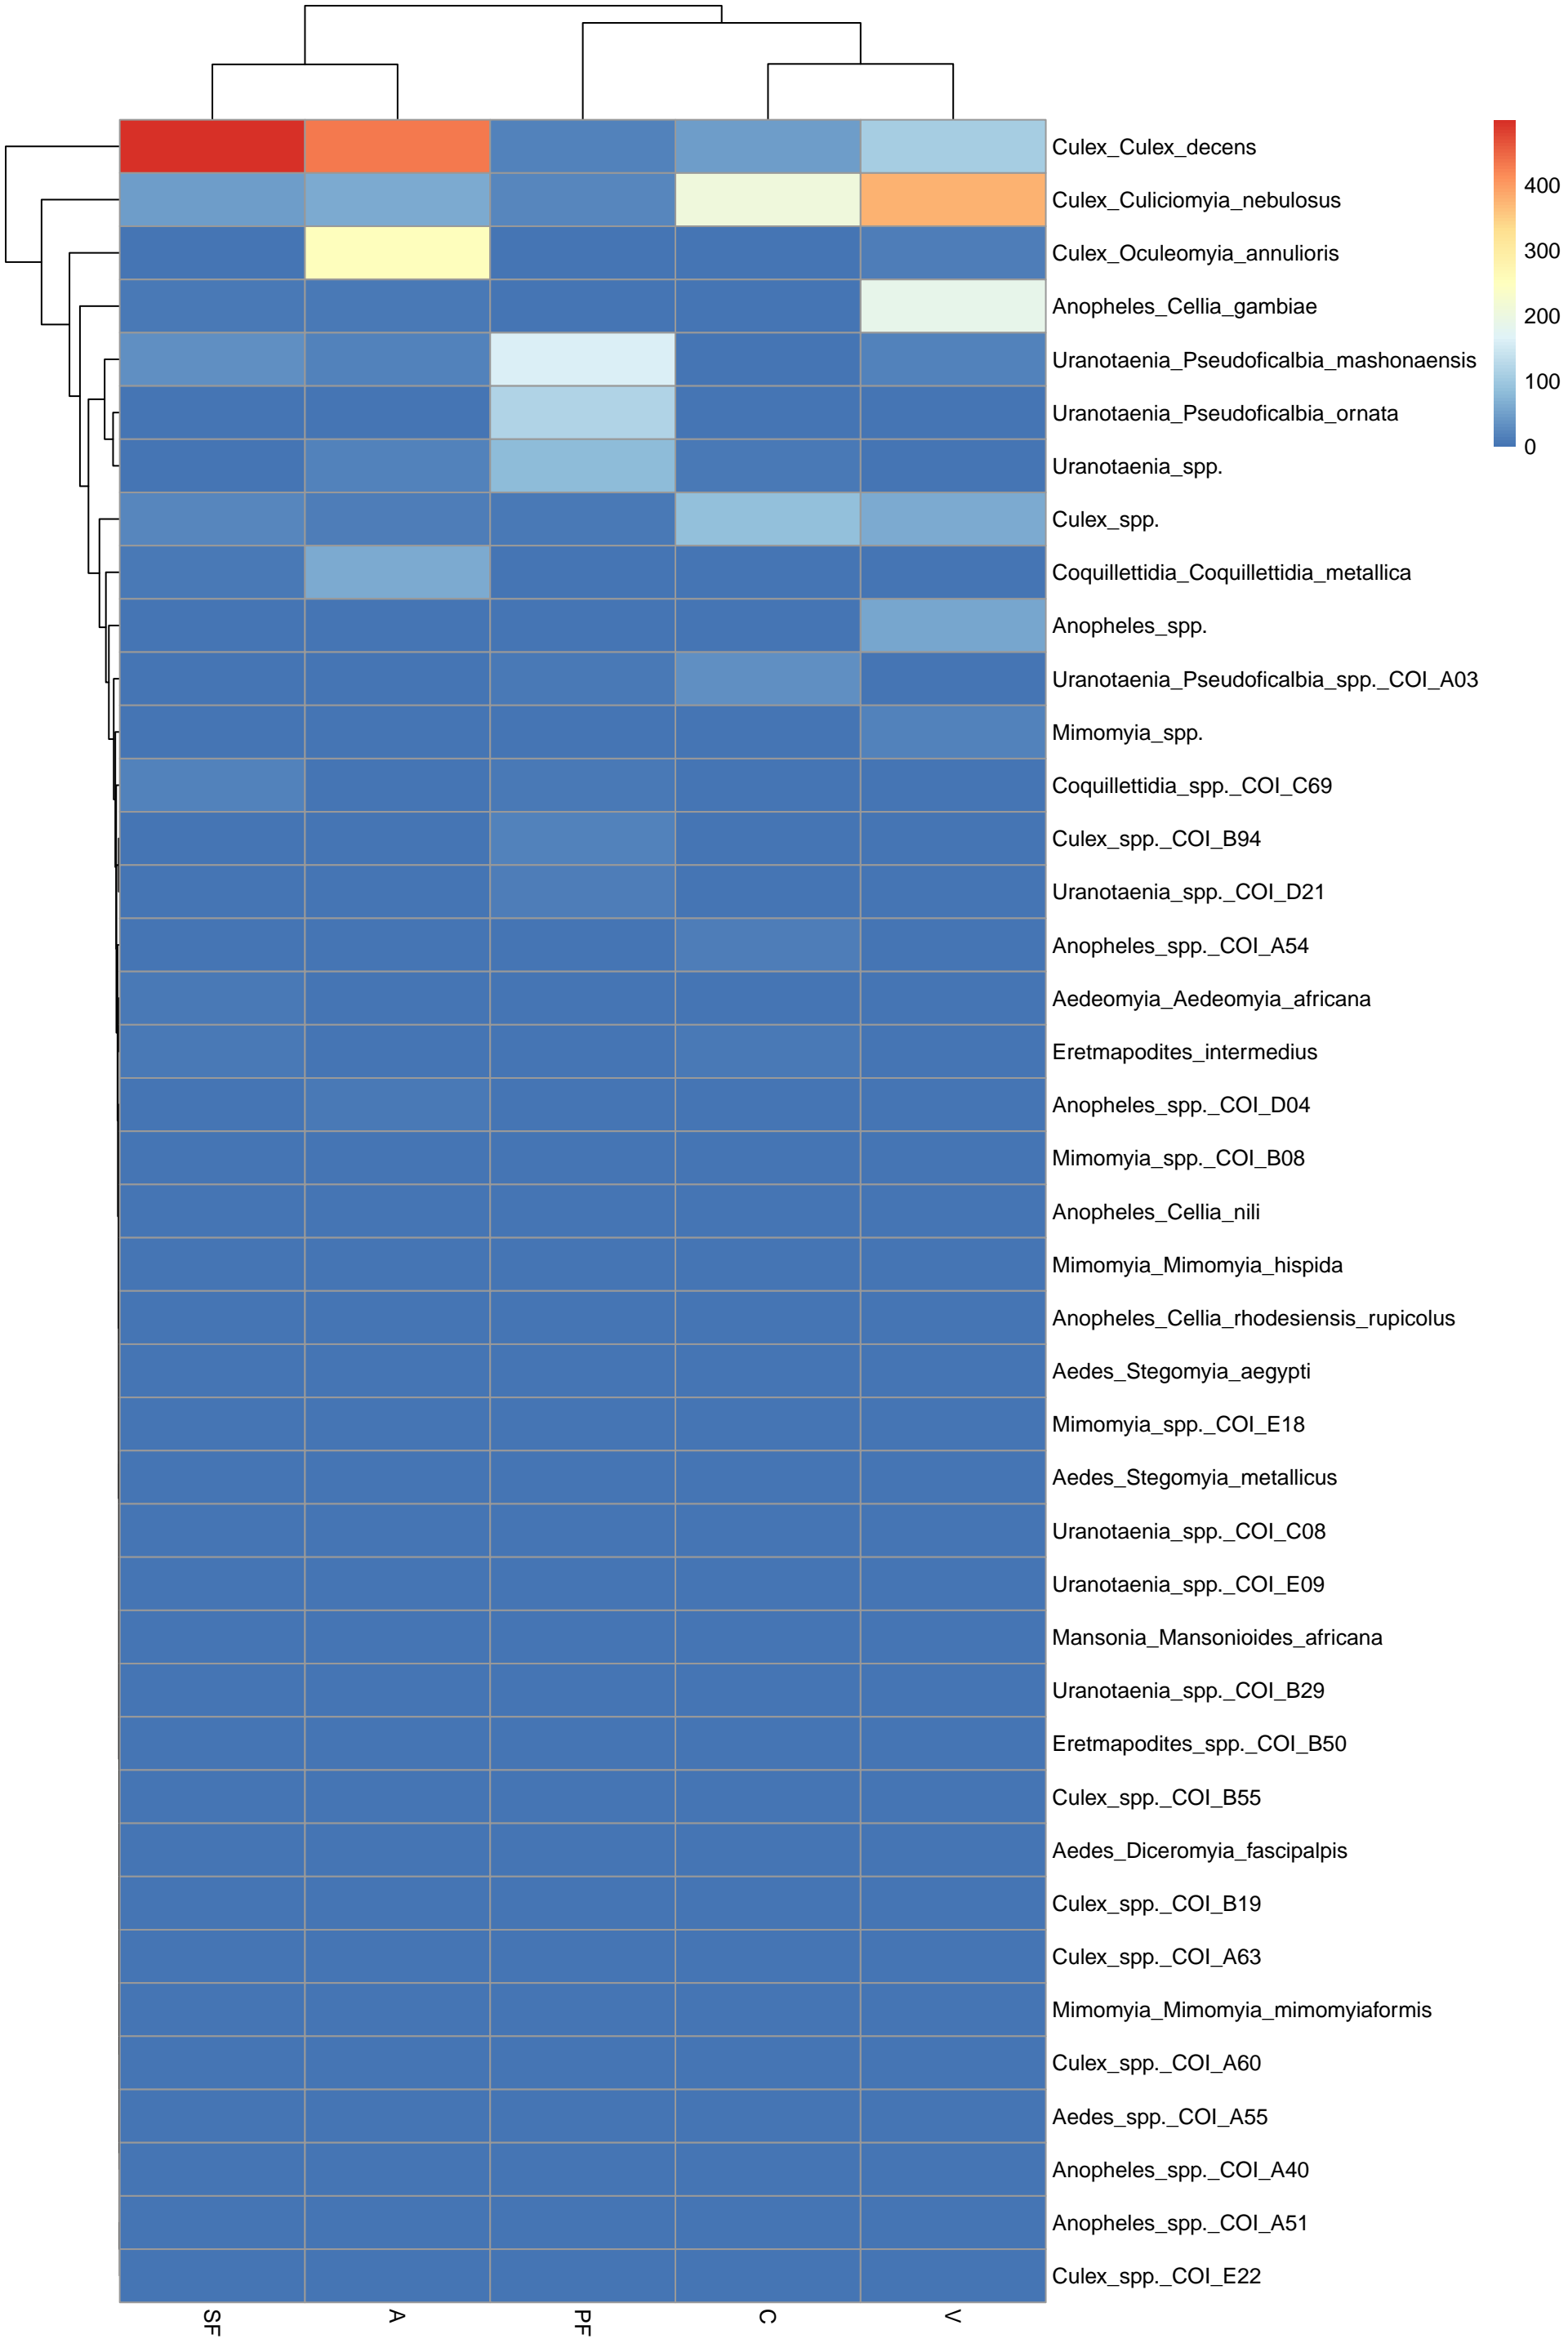

Supplement: supp [file elife-66550-supp-v1.zip]

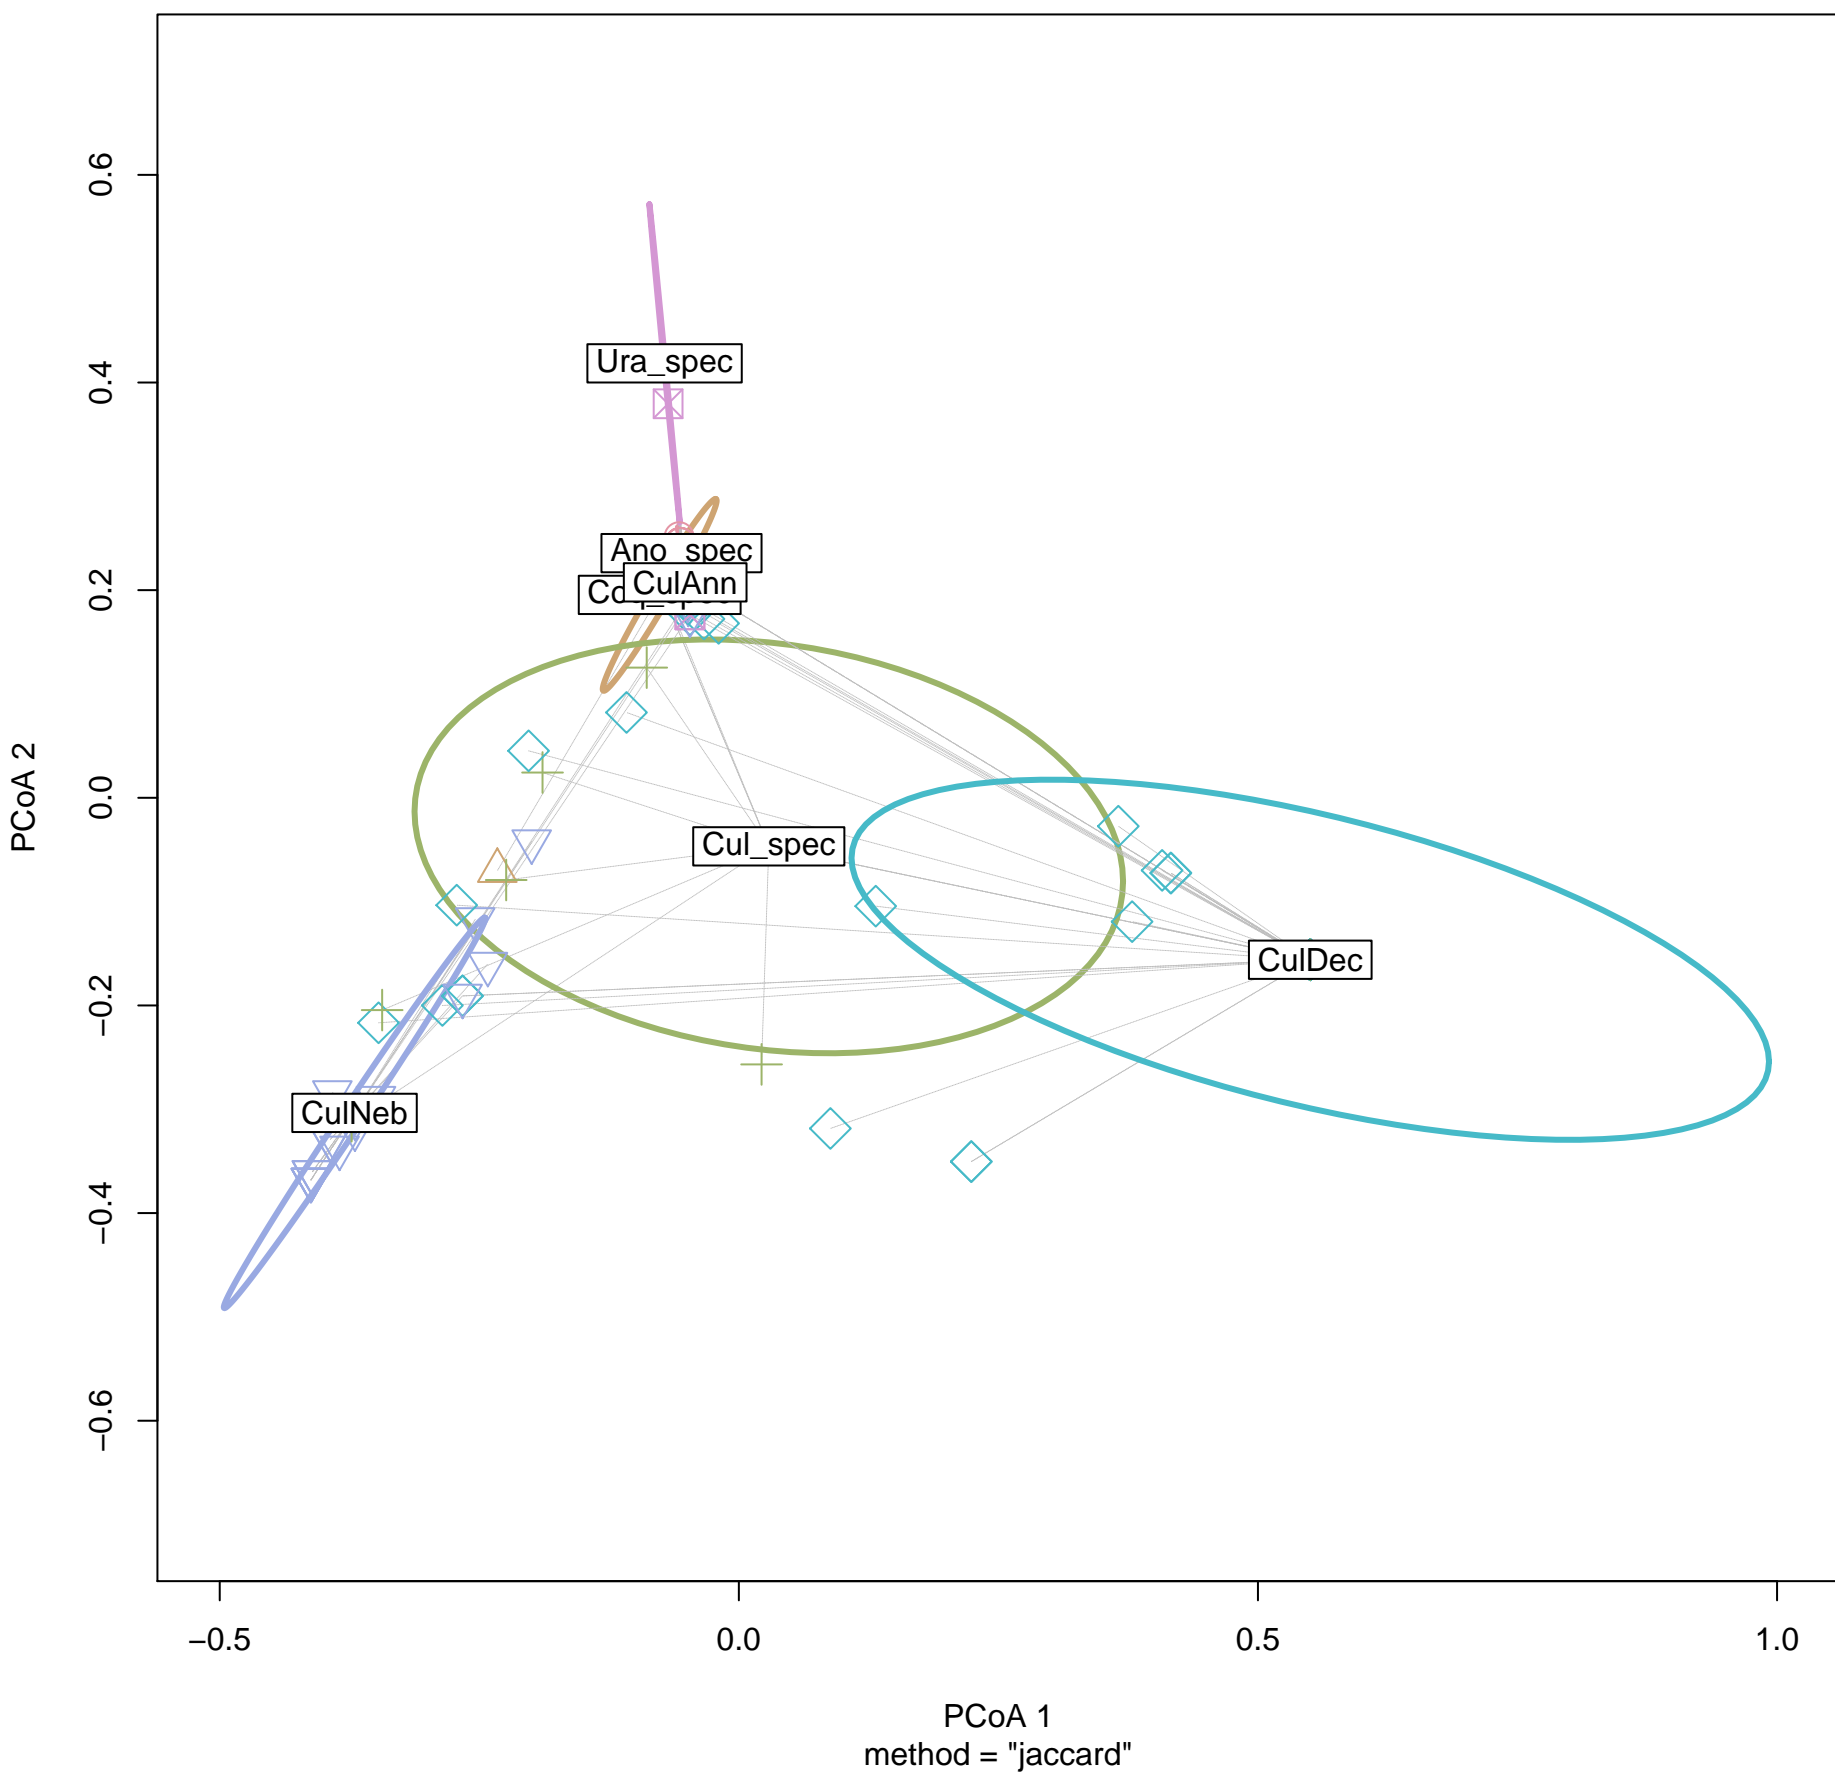

Supplement: supp [file elife-66550-supp-v1.zip]

**A**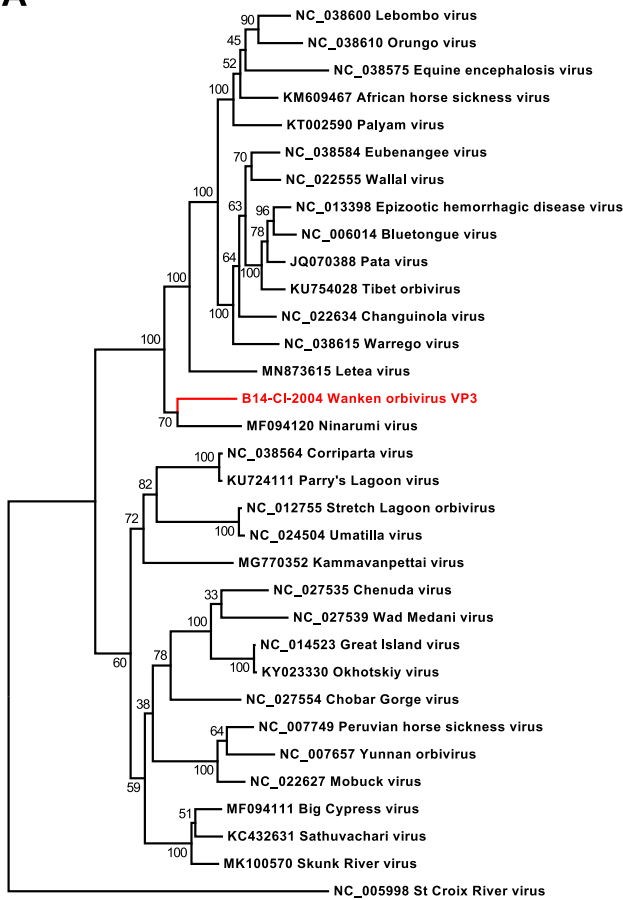**B**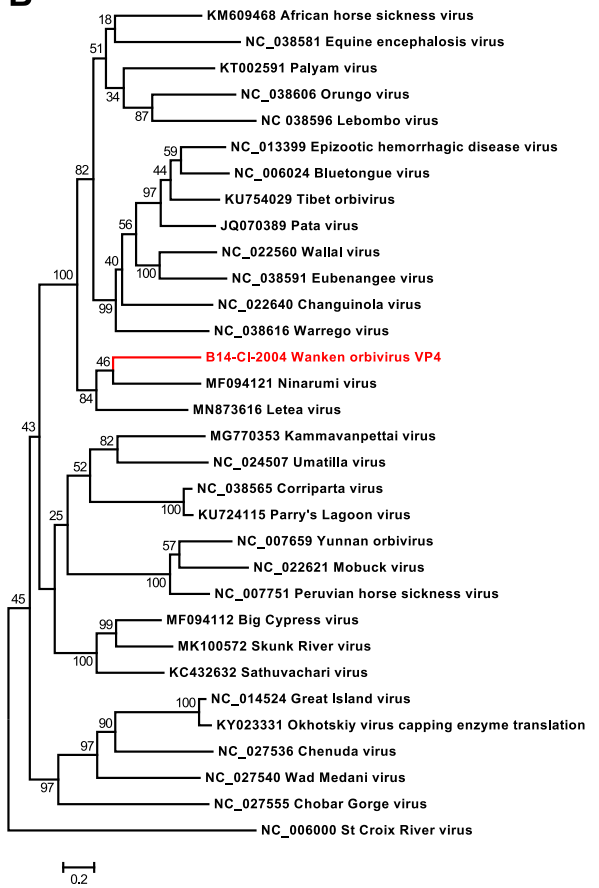**C**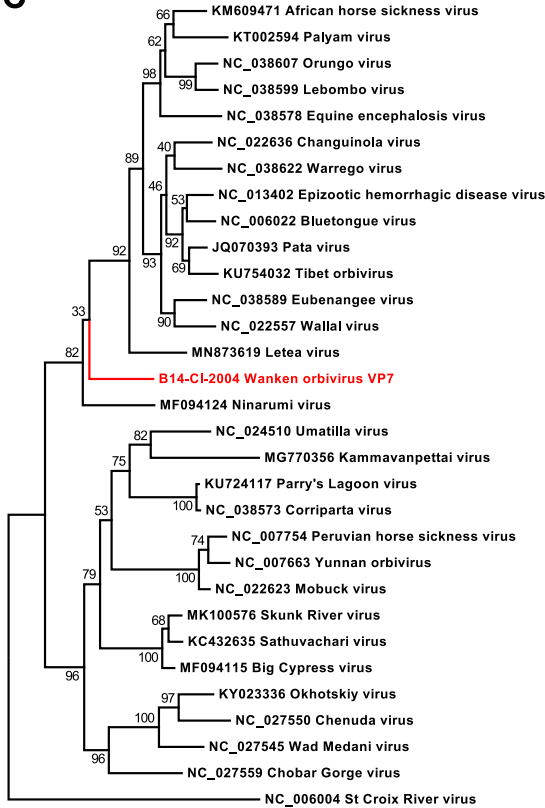**D**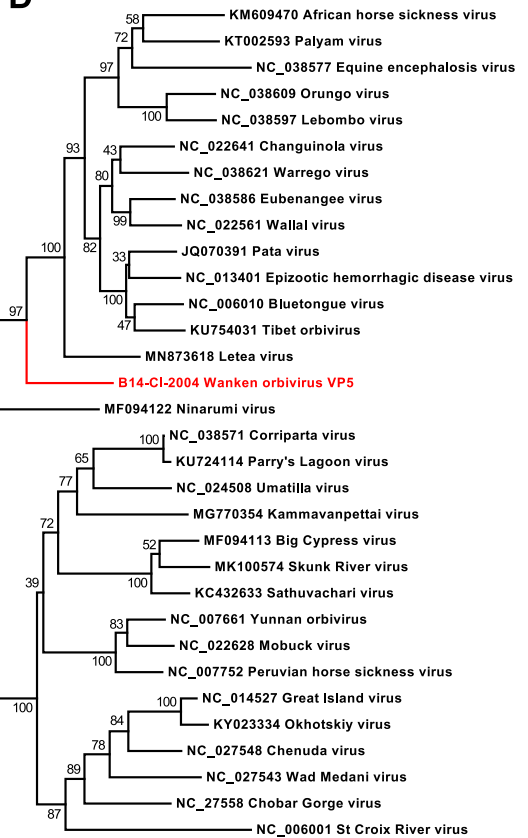

Supplement: supp [file elife-66550-supp-v1.zip]
